# Supplementary material for: Sheep’s Head as an Anatomic Model for Basic Training in Endoscopic Sinus Surgery
Source: MDPI journal article supplement (doi:10.3390/medicina59101792), 2023-10-09
Supplement: s1 [file s1]

NAME INITIALS \_\_\_\_\_

DATE \_\_\_\_\_

Level of experience in endoscopic sinus surgery:

- first-year otolaryngology resident doctor ☐

- junior otolaryngology specialist ☐

- senior otolaryngologist ☐

|                                                            | <b>Totally disagree</b> | <b>Disagree</b> | <b>Undecided</b> | <b>Agree</b> | <b>Completely agree</b> |
|------------------------------------------------------------|-------------------------|-----------------|------------------|--------------|-------------------------|
| <b>The similarity of anatomical structures to humans</b>   | 1                       | 2               | 3                | 4            | 5                       |
| <b>Realistic perception of the mucosa</b>                  | 1                       | 2               | 3                | 4            | 5                       |
| <b>Realistic perception of the bone tissue</b>             | 1                       | 2               | 3                | 4            | 5                       |
| <b>Good perception in depth</b>                            | 1                       | 2               | 3                | 4            | 5                       |
| <b>Good applicability of the basic instruments in FESS</b> | 1                       | 2               | 3                | 4            | 5                       |
| <b>Useful to improve hand-eye coordination</b>             | 1                       | 2               | 3                | 4            | 5                       |
| <b>Useful to improve surgical technique</b>                | 1                       | 2               | 3                | 4            | 5                       |

|                                                                     |   |   |   |   |   |
|---------------------------------------------------------------------|---|---|---|---|---|
| <b>Generally useful for basic endoscopic sinus surgery training</b> | 1 | 2 | 3 | 4 | 5 |
| <b>Useful for endoscopic examination of the nasal cavities</b>      | 1 | 2 | 3 | 4 | 5 |
| <b>Useful for extraction of a foreign body</b>                      | 1 | 2 | 3 | 4 | 5 |
| <b>Useful for the maxillary antrostomy</b>                          | 1 | 2 | 3 | 4 | 5 |
| <b>Useful for the ethmoidectomy</b>                                 | 1 | 2 | 3 | 4 | 5 |
| <b>Useful for the septoplasty</b>                                   | 1 | 2 | 3 | 4 | 5 |
| <b>Useful for the lower turbinoplasty</b>                           | 1 | 2 | 3 | 4 | 5 |

TOTAL SCORE:
